# Supplementary material for: High PD-L1 Expression Correlates with an Immunosuppressive Tumour Immune Microenvironment and Worse Prognosis in ALK-Rearranged Non-Small Cell Lung Cancer
Source: MDPI journal article supplement (doi:10.3390/biom13060991), 2023-06-15
Supplement: s1 [file s1]

**Table S1.** Clinical outcomes of 16 patients with ALK-rearranged NSCLC treated with crizotinib.

| PD-L1hi group (n=7) |       |      |           |      |      | PD-L1lo group (n=9) |       |      |           |      |      |
|---------------------|-------|------|-----------|------|------|---------------------|-------|------|-----------|------|------|
| case                | PD-L1 | Treg | CD8+PD-1+ | PF   | OS   | case                | PD-L1 | Treg | CD8+PD-1+ | PF   | OS   |
| 1                   | 50%   | high | low       | 2.5  | 15.8 | 1                   | 0%    | low  | low       | 47.6 | 47.6 |
| 2                   | 50%   | high | low       | 9.8  | 20.2 | 2                   | 0%    | low  | high      | 21.7 | 49.8 |
| 3                   | 65%   | high | high      | 2.8  | 24.0 | 3                   | 0%    | low  | low       | 44.9 | 52.0 |
| 4                   | 65%   | low  | low       | 15.0 | 17.5 | 4                   | 0%    | low  | high      | 26.4 | 51.7 |
| 5                   | 70%   | high | high      | 3.2  | 31   | 5                   | 0%    | high | low       | 51.1 | 63.0 |
| 6                   | 80%   | low  | high      | 2.9  | 51.4 | 6                   | 0%    | low  | high      | 35.5 | 63.7 |
| 7                   | 90%   | high | low       | 10.7 | 15.1 | 7                   | 2%    | high | low       | 8.5  | 45.7 |
|                     |       |      |           |      |      | 8                   | 5%    | low  | low       | 8.5  | 55.0 |
|                     |       |      |           |      |      | 9                   | 10%   | low  | low       | 33.5 | 36.3 |
